# Supplementary material for: Eco-friendly ferrite nanocomposite photoelectrode for improved solar hydrogen generation
Source: Royal Society of Chemistry journal article supplement (doi:10.1039/c3ra42051e), 2013-01-01
Supplement: c3ra42051e.pdf [file c3ra42051e.pdf]

# Supplementary Information

## Eco-friendly Ferrite Nano-Composite Photoelectrode for Improved Solar Hydrogen Generation

**Rekha Dom, G. Sivakumar, Neha Y. Hebalkar, Shrikant V. Joshi, and Pramod H. Borse\***

*International Advanced Research Centre for Powder Metallurgy and New Materials*

Balapur PO, Hyderabad, AP, 500 005, India

---

Corresponding Author: Dr. P.H.Borse; Email: [phborse@arci.res.in](mailto:phborse@arci.res.in);  
Tel.: 914024452426; Fax: 914024442699

## PHYSICO-CHEMICAL CHARACTERIZATION

**Table SI-1** : Quantitative elemental analysis of the films showing the variation in Zn:Fe ratio (as estimated from EDS) and corresponding photocurrents generated under simulated solar (AM 1.5G solar simulator) light and white light (Hg-arc lamp-500watt).

| Film                      | Zn: Fe ratio<br>(from EDS) | Photocurrent<br>under Solar<br>simulator<br>( $\mu\text{A}/\text{cm}^2$ ) | Photocurrent<br>under white<br>light<br>( $\mu\text{A}/\text{cm}^2$ ) |
|---------------------------|----------------------------|---------------------------------------------------------------------------|-----------------------------------------------------------------------|
| $\text{Fe}_2\text{O}_3$   | X                          | 57                                                                        | 365                                                                   |
| A1                        | 1: 5.8                     | 7.9                                                                       | 17.6                                                                  |
| A2                        | 1: 2.8                     | 80.0                                                                      | 187.0                                                                 |
| <b>FNCP</b>               | <b>1: 2.5</b>              | <b>143</b>                                                                | <b>530</b>                                                            |
| $\text{ZnFe}_2\text{O}_4$ | 1: 2.0                     | 24                                                                        | 62                                                                    |
| A4                        | 1: 1.6                     | 2.8                                                                       | 5.9                                                                   |

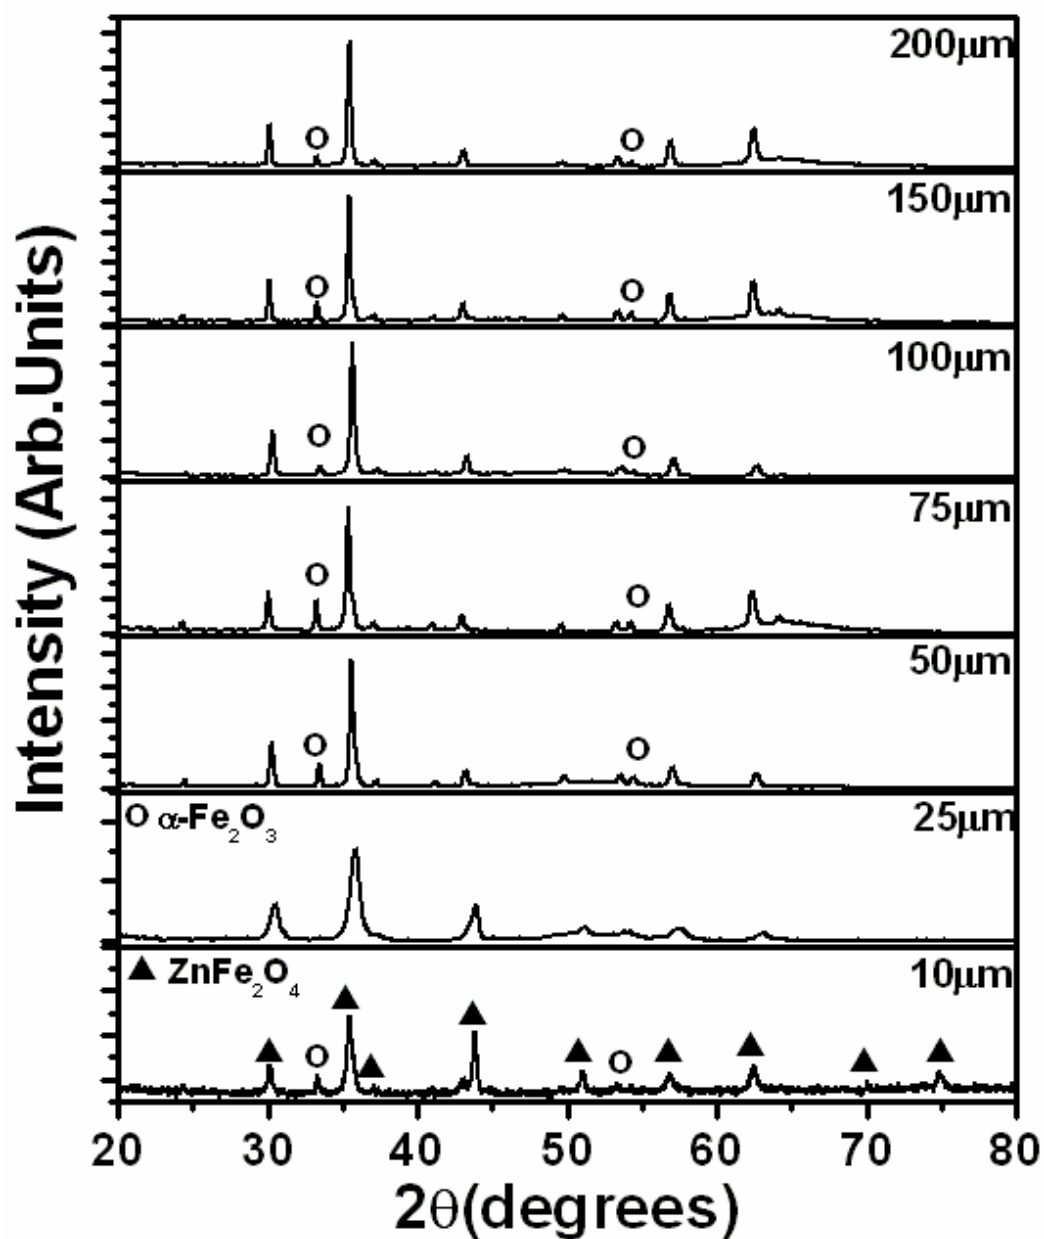

**Figure SI-1.** The XRD spectra of the films with respect to number of passes (thickness variation -as estimated by FESEM) during the SPPS deposition technique. The unassigned peaks are due to SS substrate.

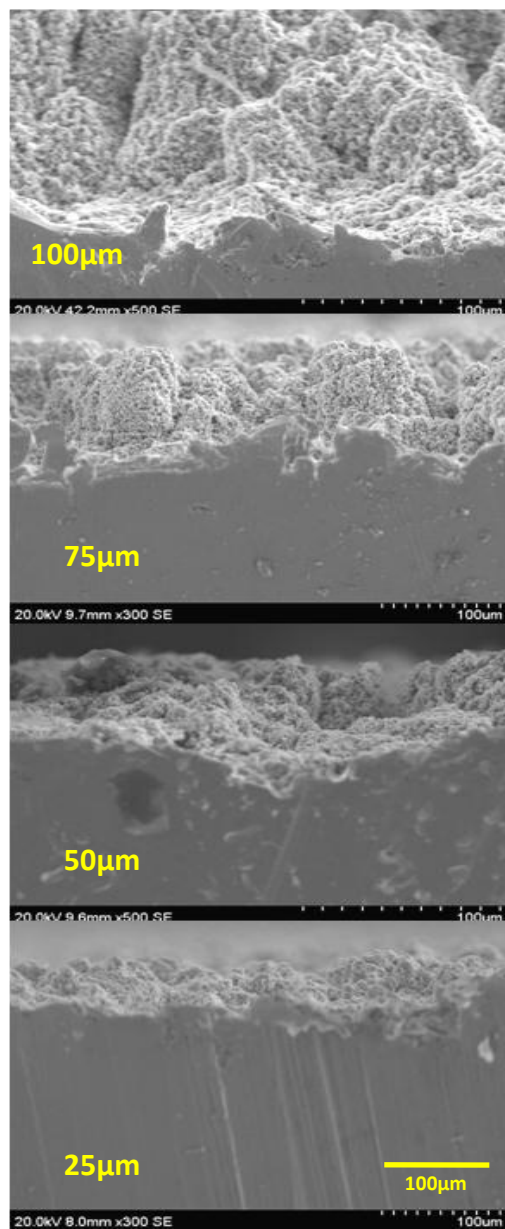

**Figure SI-2** Film cross-section as viewed during FESEM for the typical ZFO/SS films deposited with various thickness. The thickness is indicated on left corner of each image. The scale bar is common to all images.

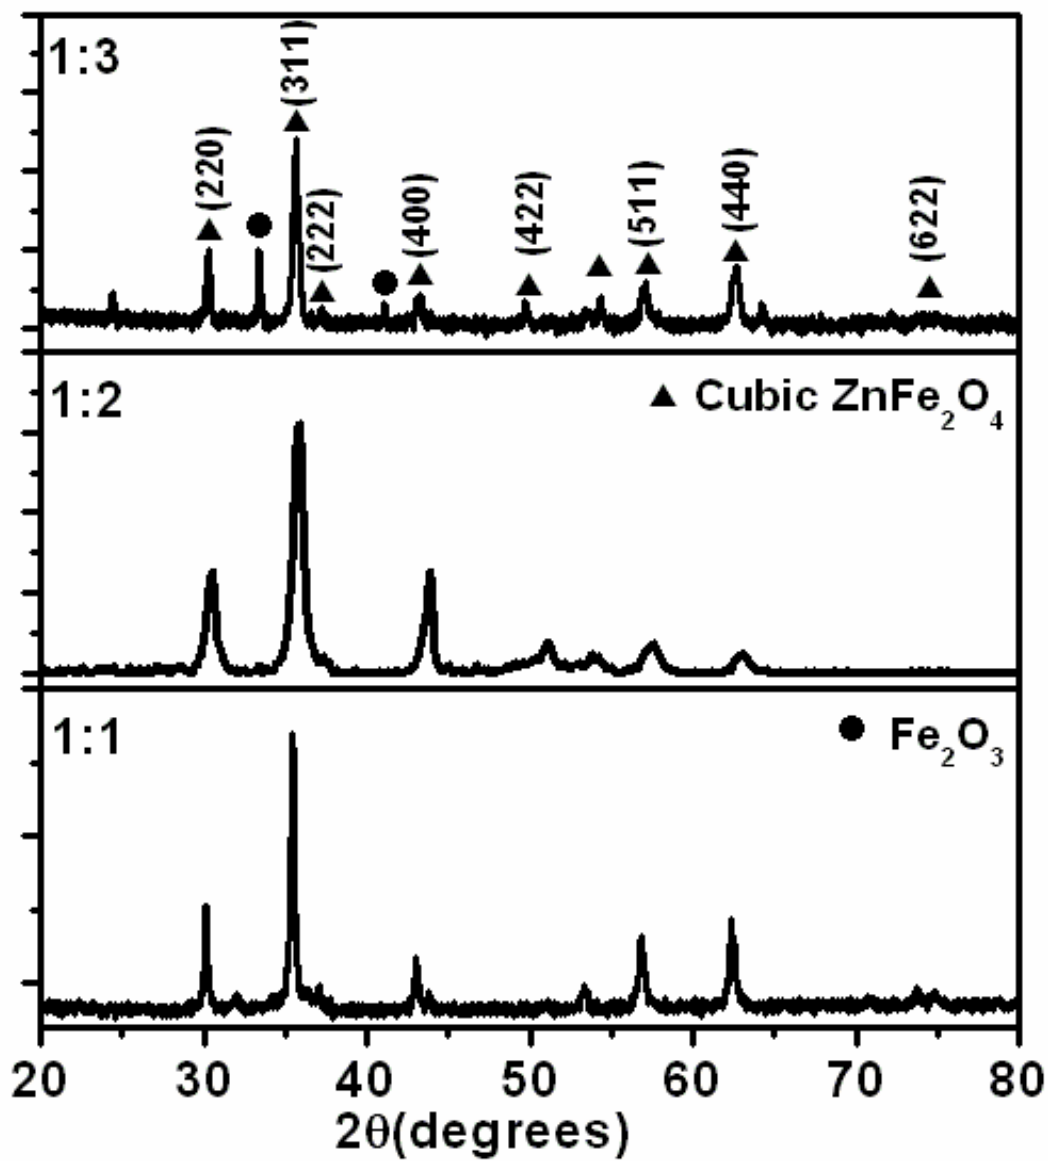

**Figure SI-3.** The XRD spectra of the FNCP films w.r.t. Zn:Fe stoichiometry variation as deposited by SPPS method.

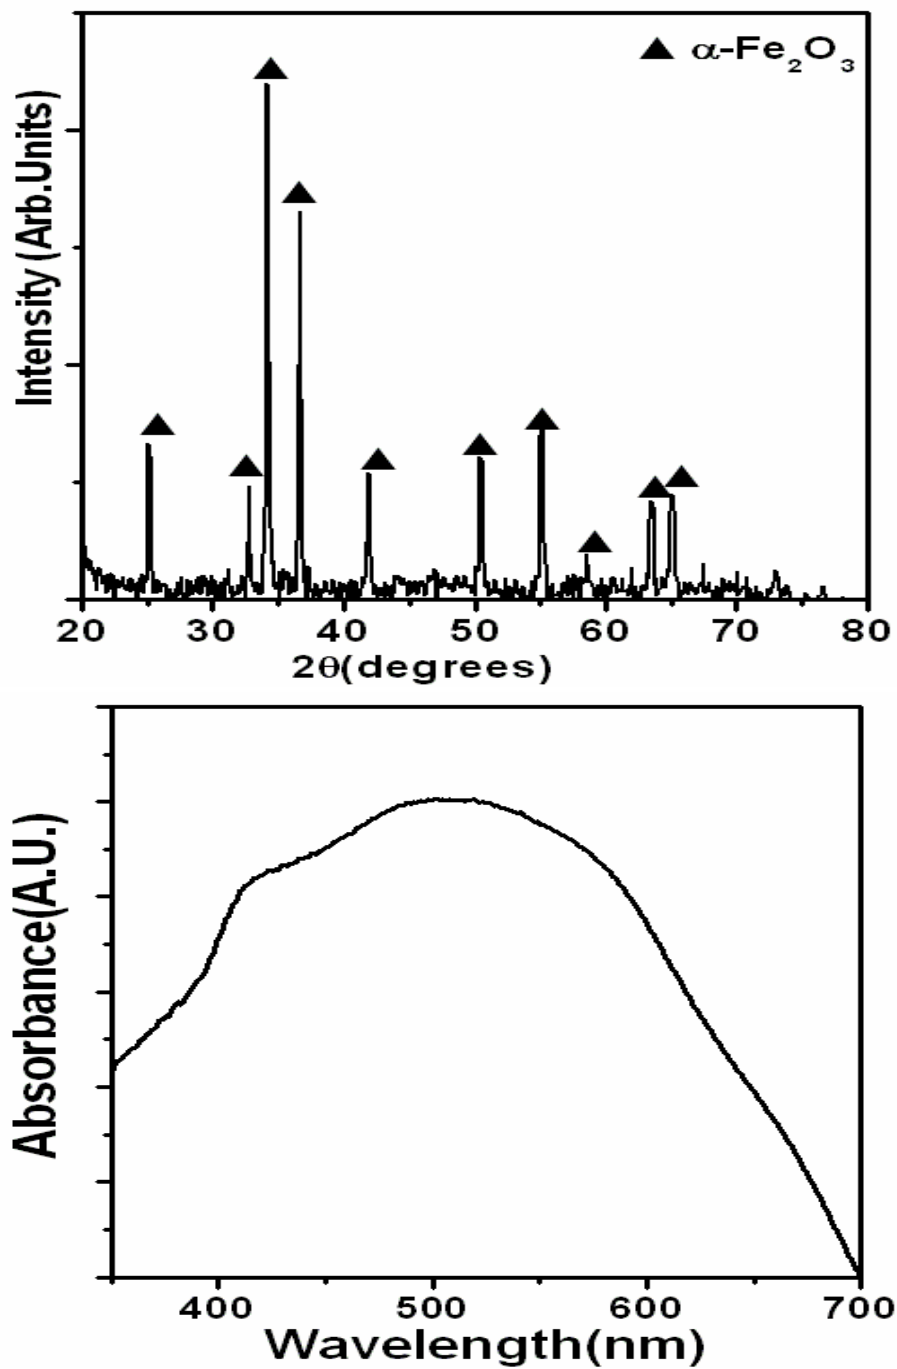

**Figure SI-4.** XRD and DRS spectra of Fe<sub>2</sub>O<sub>3</sub> film deposited by SPPS deposition method, keeping all other deposition parameters same as used for FNCP deposition.

## XPS characterization of FNCP and ZFO films

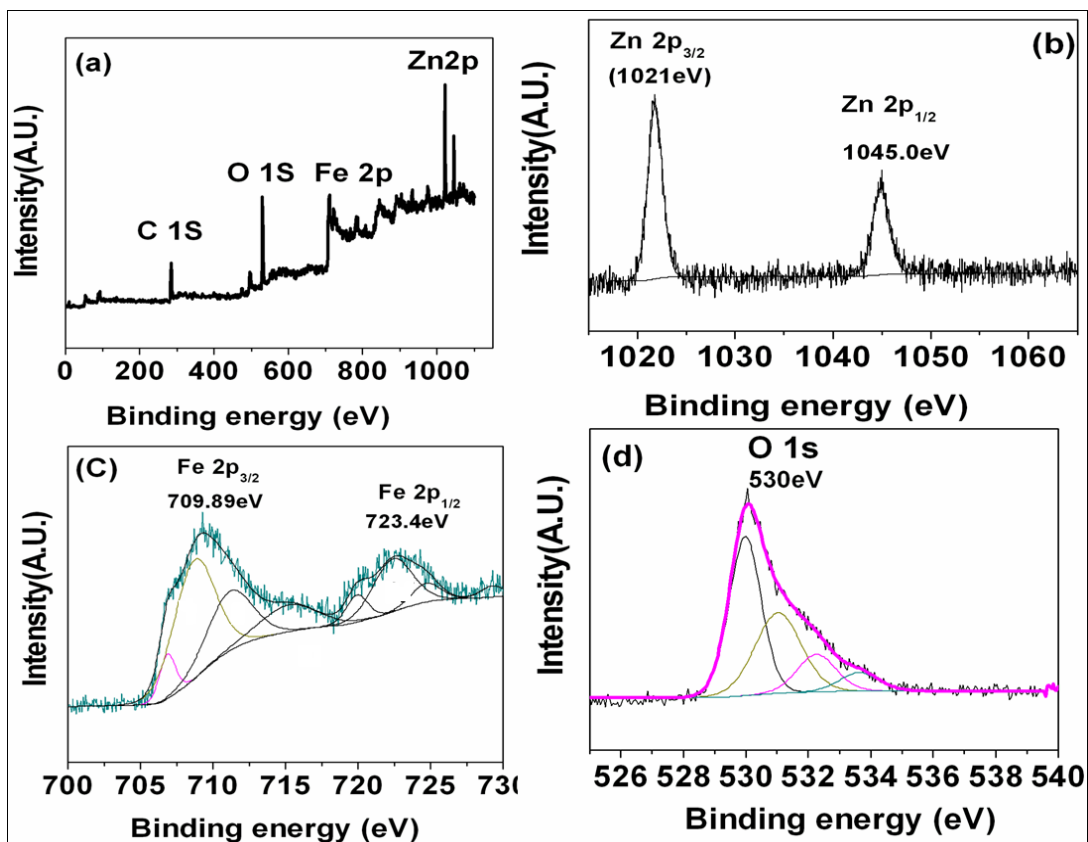

**Figure SI-5a.** XPS of FNCP Film (a) survey scan; and region scan for (b) Zn-2p; (c) Fe-2p and (d) O-1s. It clearly validates the existence of Fe<sub>2</sub>O<sub>3</sub> component along with the ZFO.

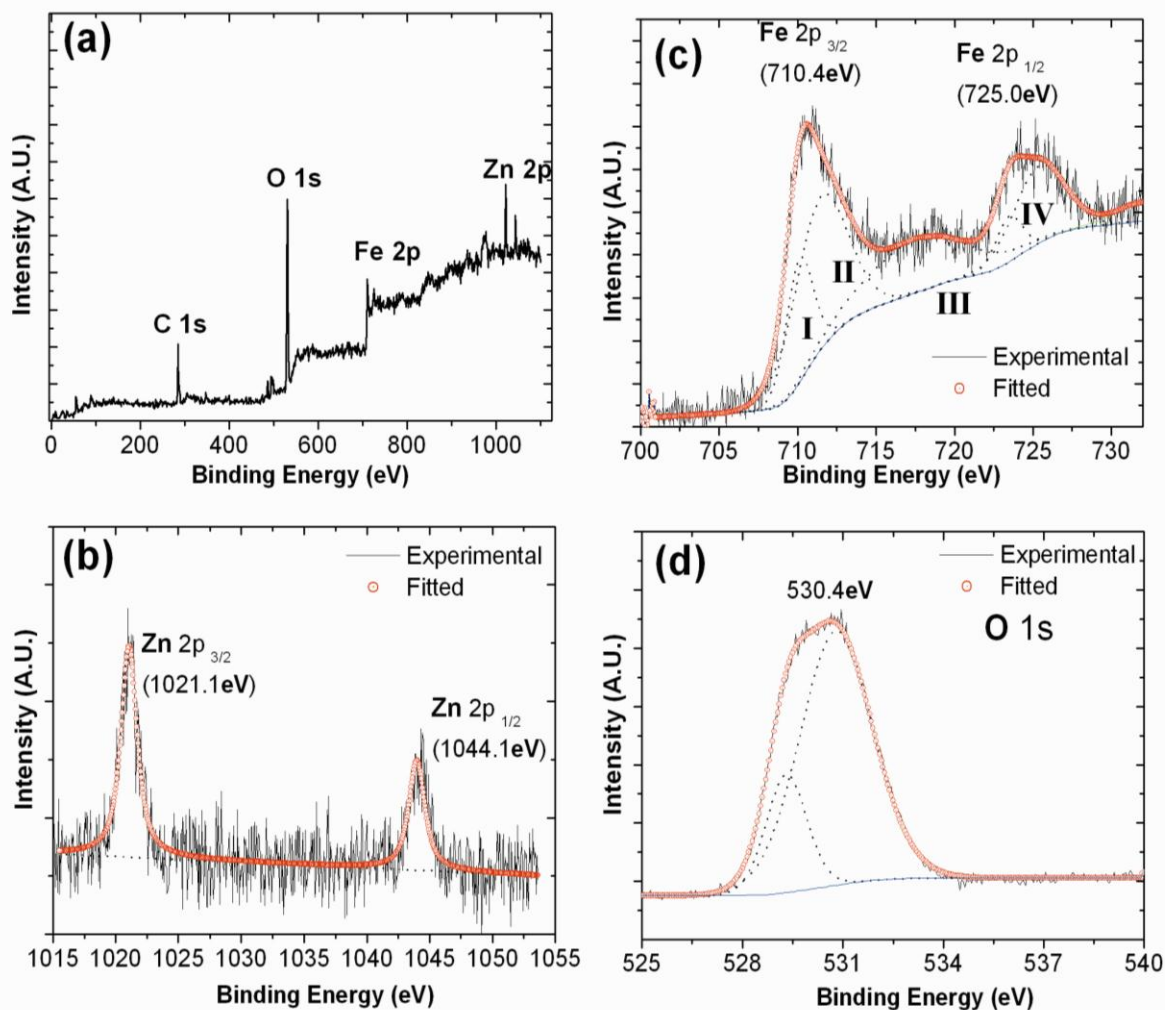

**Figure SI-5b.** XPS of typical ZFO Film (a) survey scan; and region scan for (b) Zn-2p; (c) Fe-2p and (d) O-1s.



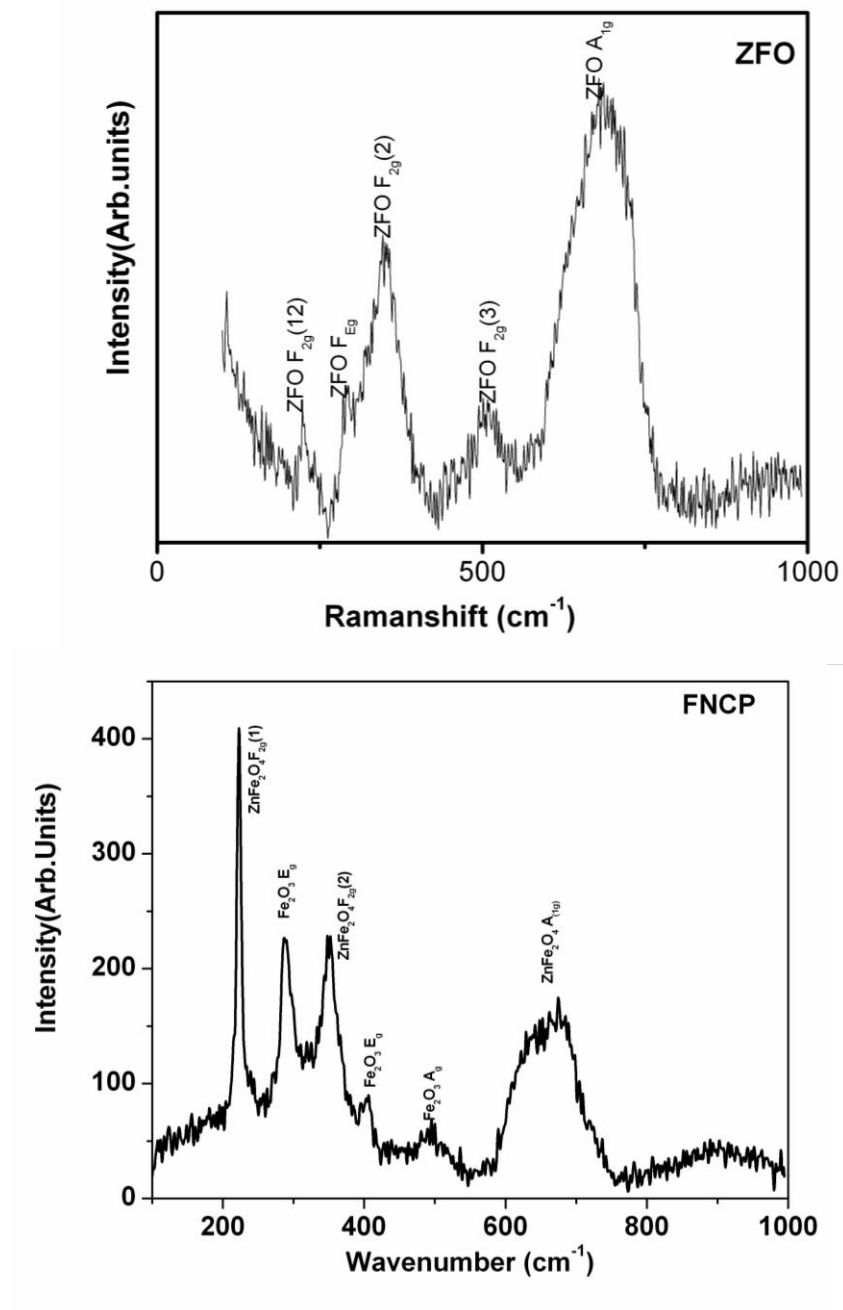

Figure SI-6. Raman spectra of typical ZFO and FNCP films

## Optical characterization of the photoanodes: Estimation of Band gap energy using UV-Visible absorption study

The band gap energy was calculated from the absorbance data of the films recorded in the range 350-700nm using Tauc relation(1);

$$\alpha h\nu = A(h\nu - E_g)^q \dots\dots\dots (1)$$

Where  $A = [\frac{e^2}{qch^2m_e^*}]x^2(2m_r)^{3/2} \dots\dots\dots (2)$

Here,  $\alpha$  is the measured absorption coefficient ( $\text{cm}^{-1}$ ) near the absorption edge, A is the constant,  $h\nu$  is the photon energy(eV),  $E_g$  is the optical band gap(eV), q is a constant. The value of q is determined from the nature of optical transition. q is the index that characterizes the optical absorption process and is theoretically equal to 2 for allowed indirect, 1/2 for allowed direct, 3 for forbidden indirect, and 3/2 for forbidden direct electronic transitions.  $m_e^*$  and  $m_r$  are the effective and reduced masses of charge carriers, respectively. The optical band gap can be estimated from the intercept of the extrapolated linear fit for the plotted experimental data of  $(\alpha h\nu)^q$  versus incident photon energy ( $h\nu$ ) near the absorption edge.

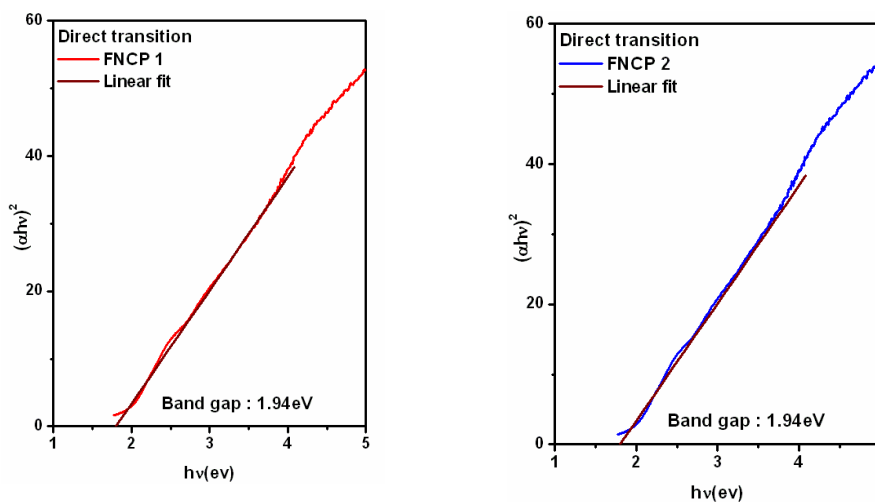

Figure SI-7. Tauc plots of typical FNCP films revealing direct band gap energies

## Mott-Schottky characterization of FNCP

The impedance measurements allow the derivation of capacitance at the semiconductor-electrolyte- interface, which can be described by a Mott-Schottky (MS) plot (*i.e.* graph of  $1/C^2$  vs  $V$ ). The Mott-Schottky equation is described by relationship

$$\frac{1}{C_{sc}^2} = \frac{2}{(\epsilon_s \epsilon_0 e N_D S^2)(V_B - V_{fb})} \dots \dots \dots (4)$$

$\epsilon_s$  is the dielectric constant of the semiconductor 100

$\epsilon_0$  is the vacuum permittivity and is  $8.85 \times 10^{-12} \text{C}^2/\text{Nm}^2$

$N_D$  is the Donor density and  $S$  the surface area of the electrode in  $\text{cm}^2$ .

Mott-Schottky study of FNCP films deposited by SPPS method was carried out in 1M NaOH electrolyte (pH-13.6) with a three-electrode set up. DC potential from -1.0-1.0V vs SCE was applied at the AC frequency of 10kHz and AC amplitude of 10mV.

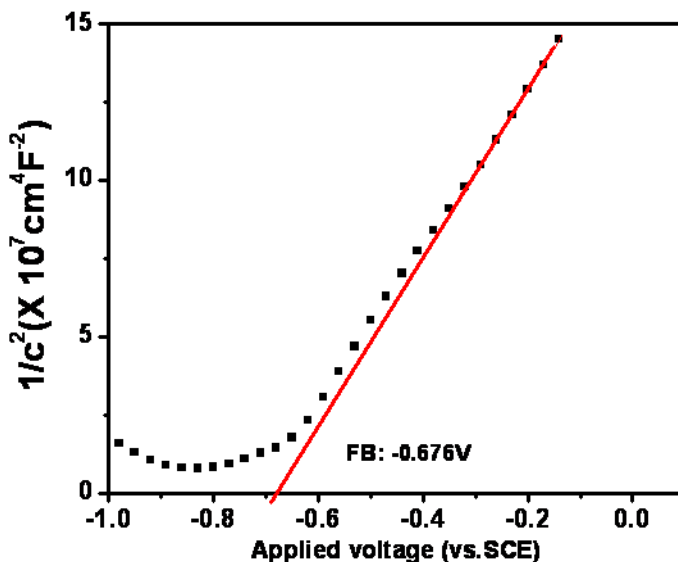

**Figure SI-8(a).** Mott-Schottky plot for FNCP film measured at an AC frequency of 10kHz under dark conditions in 1M NaOH (pH-13.6) and with AC amplitude of 10mV. The reference electrode was SCE.

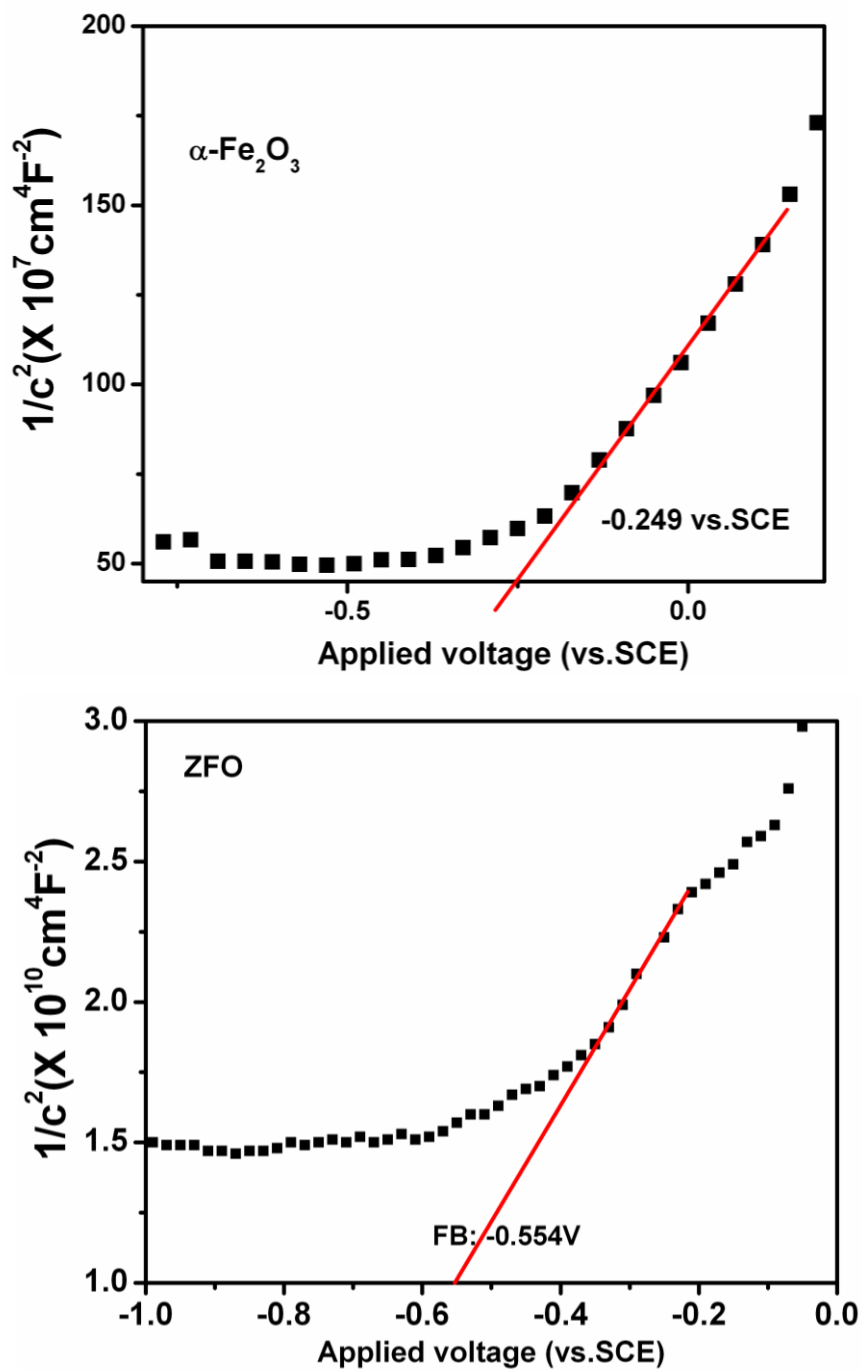

**Figure SI-8(b).** Mott-Schottky plots for  $\alpha\text{-Fe}_2\text{O}_3$  and ZFO films measured at an AC frequency of 10kHz under dark conditions in 1M NaOH (pH-13.6) and with AC amplitude of 10mV. The reference electrode was SCE.
